# Supplementary material for: Effect of Levocarnitine vs Placebo as an Adjunctive Treatment for Septic Shock: The Rapid Administration of Carnitine in Sepsis (RACE) Randomized Clinical Trial
Source: PubMed Central journal article supplement (PMC6324339; doi:10.1001/jamanetworkopen.2018.6076), 2018-12-21
Supplement: jamanetwopen-1-e186076-s002.pdf [file jamanetwopen-1-e186076-s002.pdf]

# Data Sharing Statement

Jones. Effect of Levocarnitine vs Placebo as an Adjunctive Treatment for Septic Shock. *JAMA Netw Open*. Published December 21, 2018. 10.1001/jamanetworkopen.2018.6076

## Data

**Data available:** Yes

**Data types:** Deidentified participant data

**How to access data:** Consistent with NIH policy, at the completion of the study award period and all ancillary analyses, data will be de-identified and locked. At that time requests for data sharing can be made to the PI with specific data needs, analysis plans and dissemination plans. Those requests will be reviewed by a study steering committee and the study sponsor for release. Contact: aejones@umc.edu

**When available:** With publication

## Supporting Documents

**Document types:** Other (please specify)

**Additional Information:** Trial protocol included with submission documents

**How to access documents:** Documents provided during submission

**When available:** With publication

## Additional Information

**Who can access the data:** Requests for data sharing can be made to the PI with specific data needs, analysis plans and dissemination plans. Those requests will be reviewed by a study steering committee and the study sponsor for release.

**Types of analyses:** For any proposed purpose approved by the study steering committee.

**Mechanisms of data availability:** After approval of a proposal

**Any additional restrictions:** All data will be deidentified and protected health information stripped. Dates will be time shifted to eliminate PHI, as needed.
